# Supplementary material
Source: publisher figshare collection journal article supplement (https://acs.figshare.com/ndownloader/files/5159281)
Supplement: Supplementary file 1 [file 5159281]

## Supporting information

### **Combinatorial Synthesis of Epitaxial $\text{LiCoO}_2$ Thin Films on $\text{SrTiO}_3(001)$ via on-Substrate Sintering of $\text{Li}_2\text{CO}_3$ and $\text{CoO}$ by Pulsed Laser Deposition**

*Shingo Maruyama,<sup>†</sup> Osamu Kubokawa,<sup>‡</sup> Kohei Nanbu,<sup>§</sup> Kenjiro Fujimoto,<sup>§</sup> Yuji  
Matsumoto<sup>†,‡</sup>*

<sup>†</sup>Department of Applied Chemistry, Tohoku University, 6-6-07 Aramaki-Aza-Aoba,  
Aoba-ku, Sendai, Miyagi, 980-8579, JAPAN

<sup>‡</sup>Materials and Structure Laboratory, Tokyo Institute of Technology, 8259  
Nagatsuta-cho, Aoba-ku, Yokohama, Kanagawa, 226-8503, JAPAN

<sup>§</sup>Department of Pure and Applied Chemistry, Tokyo University of Science, Yamazaki  
2641, Noda, Chiba, 278-8510, JAPAN

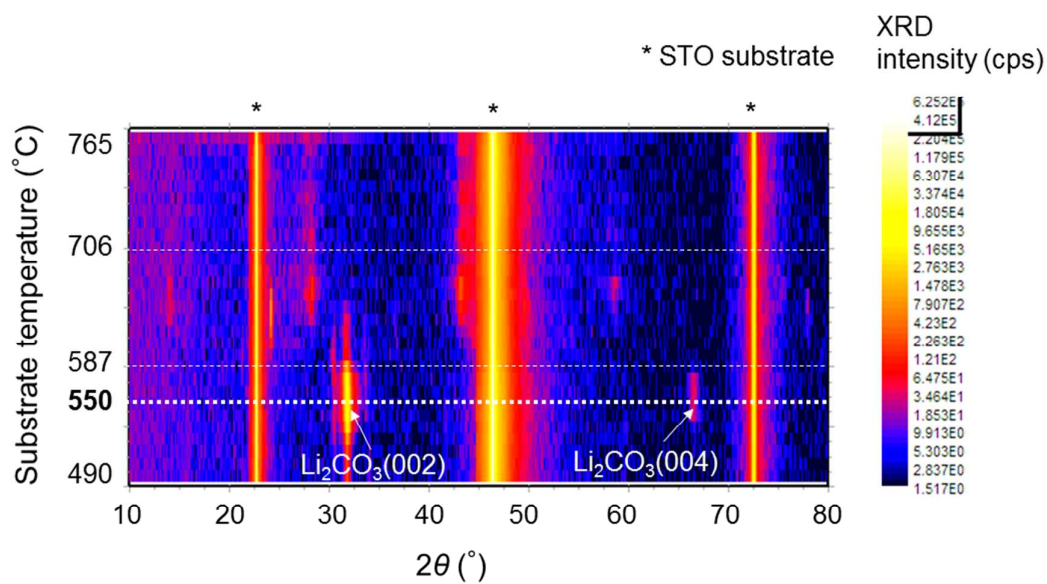

**Figure S1.** Out of plane XRD image plot of  $\sim 1 \mu\text{m}$   $\text{Li}_2\text{CO}_3$  film deposited on 0.5wt%Nb:STO(001) substrate 200 mTorr oxygen with temperature gradient from 490 to 765 ° C along 15 mm substrate. The peak intensity of  $\text{Li}_2\text{CO}_3(00l)$  became maximum at the growth temperature of 550 ° C.

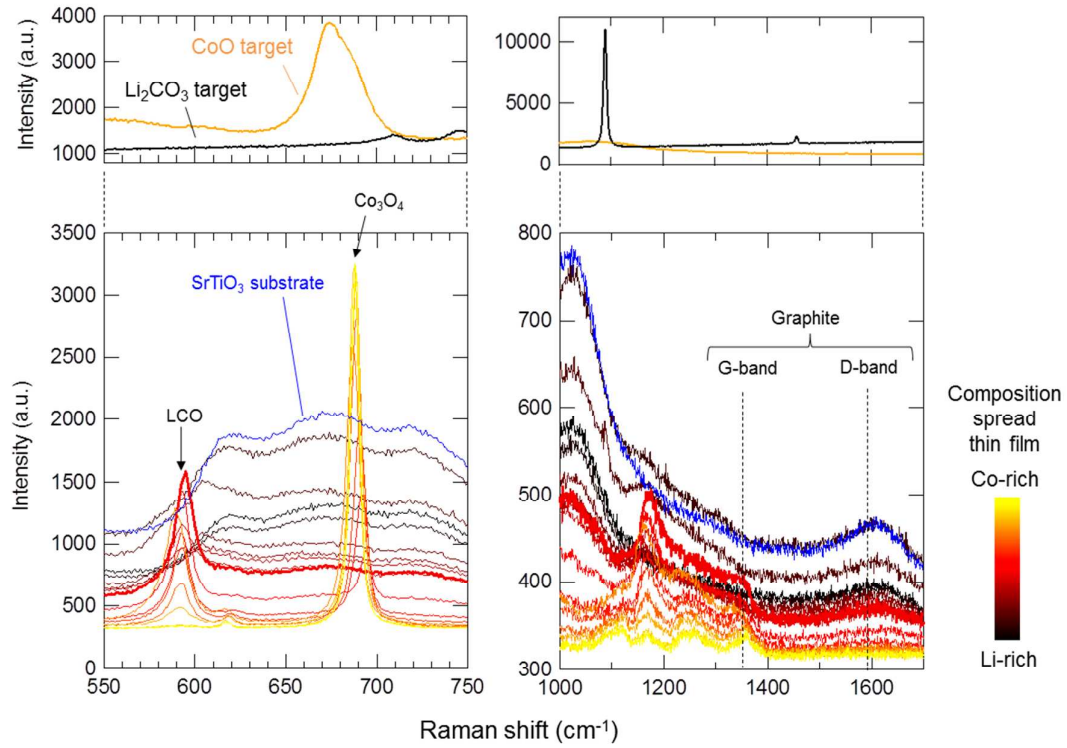

**Figure S2.** Raman spectra ( $\lambda = 532$  nm) of the PLD targets ( $\text{Li}_2\text{CO}_3$  and  $\text{CoO}$ , top graphs) and  $\text{Li}_2\text{CO}_3$ - $\text{CoO}$  composition spread thin film grown on  $\text{STO}(001)$  substrate (bottom graphs). The bold curve in the composition spread thin film is the spectrum taken at the position where XRD intensity of  $\text{LCO}(104)$  became maximum as shown in Fig.1(e). The graphite G- ( $\sim 1350$   $\text{cm}^{-1}$ ) and D-bands ( $\sim 1590$   $\text{cm}^{-1}$ ) are denoted by the dotted lines in the bottom graph. Since the peak observed at the G-band position became stronger in the Co-rich region, this peak is not originated from the carbon from  $\text{Li}_2\text{CO}_3$ . The broad peak observed at the D-band position is due to the Nb:STO substrate. Thus, there is no graphite related Raman peak in the composition spread thin film.

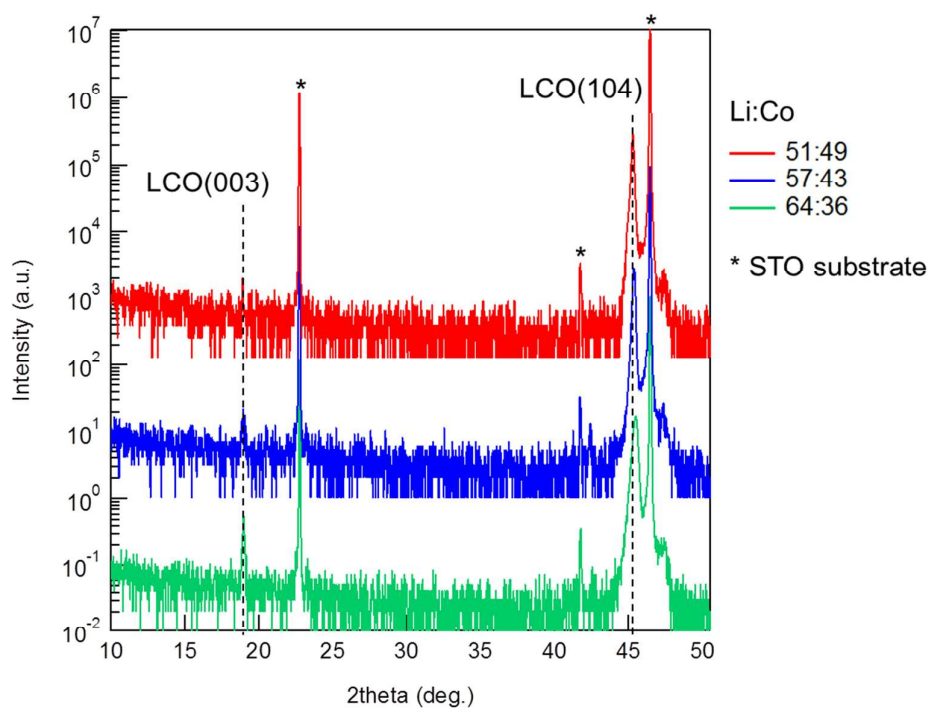

**Figure S3.** XRD patterns of the uniform LCO thin films with different nominal Li:Co ratio.

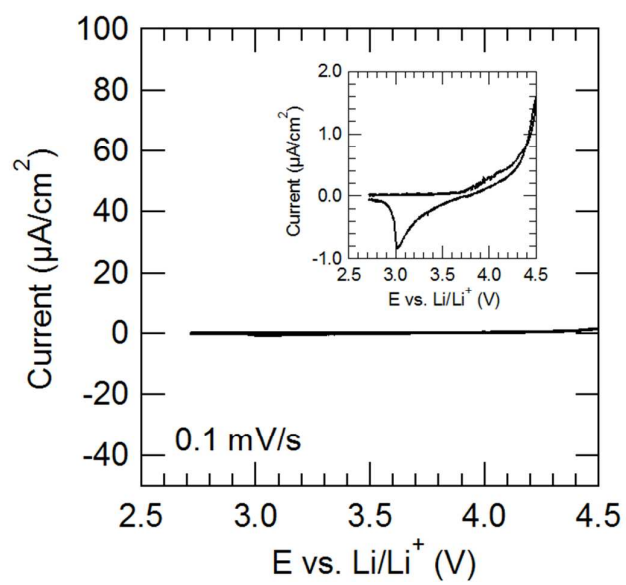

**Figure S4.** Cyclic voltammogram of the bare Nb:STO(001) substrate. The current range is the same with the Figure 5 (Inset shows the magnified plot).
